# Supplementary figures and images for: A UV-vis-fluorescence-smartphone-assisted hydrogel “three-in-one” platform based on light-responsive carbon dot nanozyme for multimodal glyphosate detection
Source: Research Square preprint supplement (doi:10.21203/rs.3.rs-8637701/v1), 2026-02-10

**The full uncropped Gels image of Fig. S7 shown in supplementary material 1.**


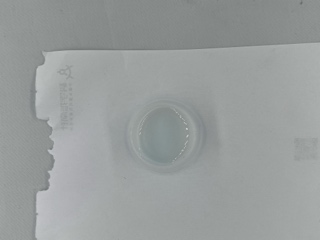

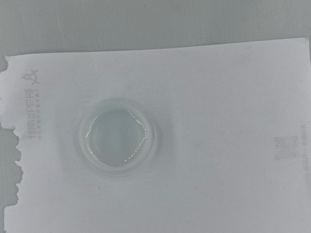

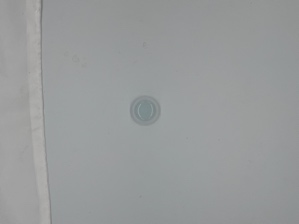

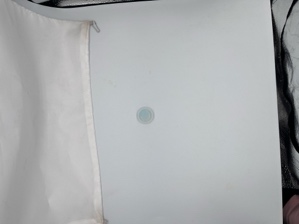

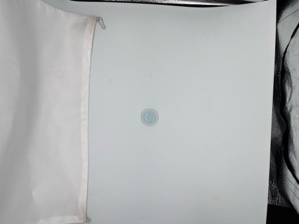

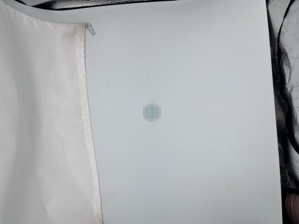

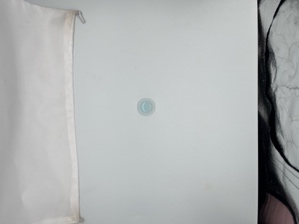

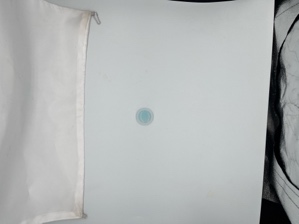

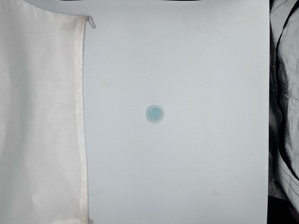

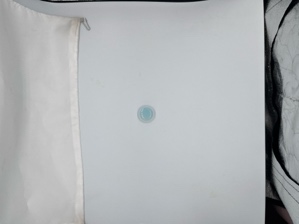

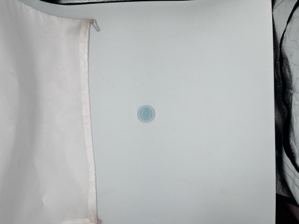

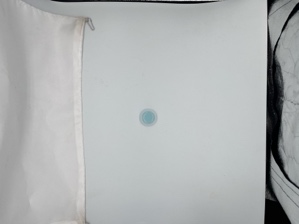

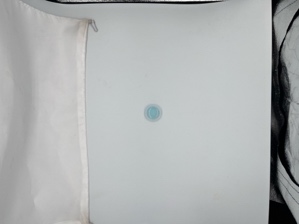

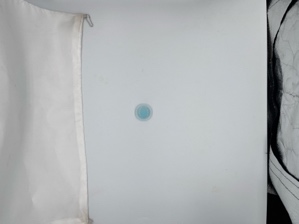

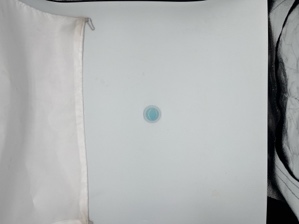

Supplement: Supplementary file 2 [file 8876d848be17a4f86ecc2005.docx]

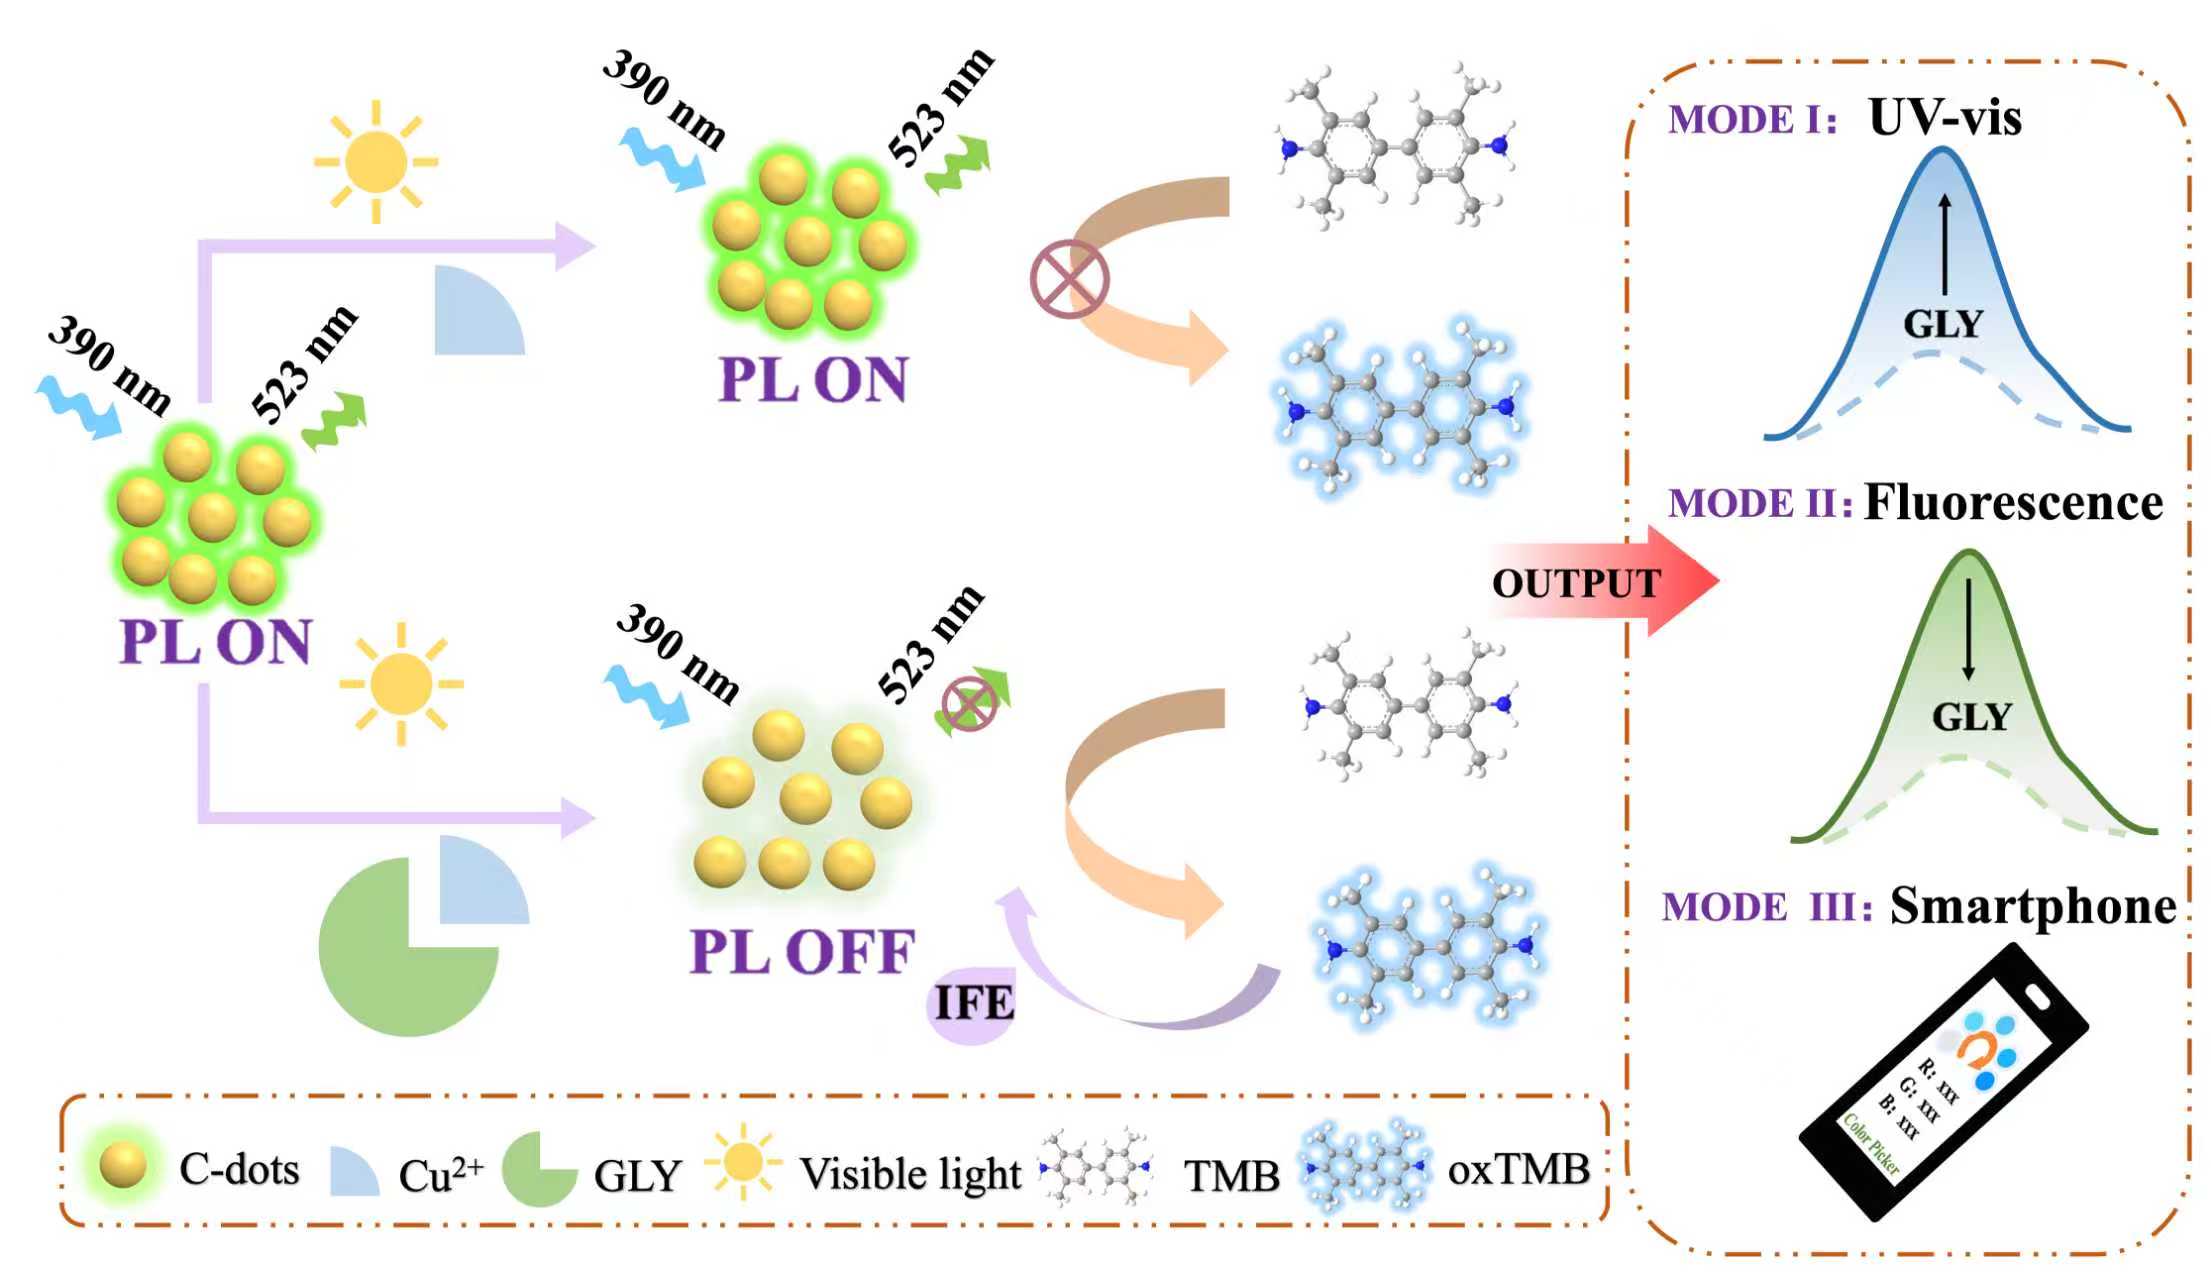

Supplement: Supplementary file 3 [file c58f12aa3b966b7cbdf3d98a.docx]
